# Supplementary material for: Bacterial Communities in Pigmented Biofilms Formed on the Sandstone Bas-Relief Walls of the Bayon Temple, Angkor Thom, Cambodia
Source: PubMed Central journal article supplement (PMC4070708; doi:10.1264/jsme2.me13033), 2013-12-13
Supplement: 28_422_s1.pdf [file 28_422_s1.pdf]

1 Table S1. Phylogenetic affiliations of 16S rRNA sequences retrieved in the PCR-DGGE analysis of air and biofilm samples.

| Band name sequenced   | Accession number | Closest BLAST match (accession number)                    | Identity (%)   |
|-----------------------|------------------|-----------------------------------------------------------|----------------|
| <b><i>Air</i></b>     |                  |                                                           |                |
| A1                    | AB758608         | <i>Pseudomonas panacis</i> strain CG20106 (NR_043195)     | 488/488 (100%) |
| A2                    | AB758609         | <i>Phyllobacterium myrsinacearum</i> STM 948 (NR_043189)  | 437/437 (100%) |
| A3                    | AB758610         | <i>Pseudomonas panacis</i> strain CG20106 (NR_043195)     | 506/506 (100%) |
| A4                    | AB758611         | <i>Bosea vestrisii</i> 34635 (NR_028799)                  | 390/392 (99%)  |
| A5                    | AB758612         | <i>Phyllobacterium myrsinacearum</i> STM 948 (NR_043189)  | 431/431 (100%) |
| A8                    | AB758613         | <i>Rhodococcus erythropolis</i> N11 (NR_037024)           | 469/470 (99%)  |
| A11                   | AB758614         | <i>Pseudomonas panacis</i> strain CG20106 (NR_043195)     | 480/480 (100%) |
| <b><i>Biofilm</i></b> |                  |                                                           |                |
| F3                    | AB758615         | <i>Pseudomonas moorei</i> RW10 (NR_042542)                | 339/339 (100%) |
| F4                    | AB758616         | <i>Rubrobacter radiotolerans</i> P1 (NR_029191)           | 384/410 (94%)  |
| F5                    | AB758617         | <i>Rubrobacter radiotolerans</i> P1 (NR_029191)           | 353/374 (94%)  |
| F10                   | AB758618         | <i>Planktothricoides raciborskii</i> NIES-207 (NR_040858) | 354/390 (91%)  |
| F12                   | AB758619         | <i>Rubrobacter radiotolerans</i> P1 (NR_029191)           | 425/451 (94%)  |
| F15                   | AB758620         | <i>Caulobacter</i> sp. FWC21 (NR_041963)                  | 247/254 (97%)  |
| F17                   | AB758621         | <i>Rubellimicrobium</i> sp. MSL 20 (NR_044275)            | 164/177 (93%)  |
| F18                   | AB758622         | <i>Rubrobacter radiotolerans</i> P1 (NR_029191)           | 275/299 (92%)  |

3 Table S2. Phylogenetic affiliation of sequences derived from DGGE analysis of biofilm samples in the Bayon.

| Band name sequenced               | Accession number | Closest blast match (Accession number)                       | Identity (%)  |
|-----------------------------------|------------------|--------------------------------------------------------------|---------------|
| <b><i>Salmon pink biofilm</i></b> |                  |                                                              |               |
| P13-1                             | AB679779         | <i>Rubrobacter radiotolerans</i> strain P 1 (NR_029191)      | 383/409 (94%) |
| P13-2                             | AB679780         | <i>Rubrobacter radiotolerans</i> strain P 1 (NR_029191)      | 383/410 (93%) |
| P13-3                             | AB679781         | <i>Rubrobacter radiotolerans</i> strain P 1 (NR_029191)      | 390/415 (94%) |
| P20-1                             | AB679782         | <i>Deinococcus peraridilitoris</i> KR-200 (NR_044113)        | 331/371 (89%) |
| P20-4                             | AB679783         | <i>Deinococcus peraridilitoris</i> KR-200 (NR_044113)        | 363/407 (89%) |
| P20-5                             | AB679784         | <i>Rubrobacter radiotolerans</i> P 1 (NR_029191)             | 312/343 (91%) |
| P21-1                             | AB679785         | <i>Rubrobacter radiotolerans</i> P 1 (NR_029191)             | 390/420 (93%) |
| P21-4                             | AB679786         | <i>Rubrobacter radiotolerans</i> P 1 (NR_029191)             | 371/400 (93%) |
| P21-6                             | AB679787         | <i>Rubrobacter radiotolerans</i> P 1 (NR_029191)             | 372/407 (91%) |
| P21-10                            | AB679788         | <i>Pseudonocardia chloroethenivorans</i> SL-1 (NR_025213)    | 221/234 (94%) |
| P21-11                            | AB679789         | <i>Actinomycetospora chiangmaiensis</i> YIM 0006 (NR_042562) | 371/405 (92%) |
| P39-1                             | AB679790         | <i>Sphingomonas phyllosphaerae</i> FA2 (NR_029111)           | 313/331 (95%) |
| P39-2                             | AB679791         | <i>Truepera radiovictrix</i> RQ-24 (NR_043482)               | 313/347 (90%) |
| P39-3                             | AB679792         | <i>Sphingomonas abaci</i> C42 (NR_042192)                    | 338/359 (94%) |
| P39-5                             | AB679793         | <i>Rubrobacter radiotolerans</i> P 1 (NR_029191)             | 397/417 (95%) |
| P39-6                             | AB679794         | <i>Rubrobacter radiotolerans</i> P 1 (NR_029191)             | 259/273 (95%) |
| P39-7                             | AB679795         | <i>Rubrobacter taiwanensis</i> LS-293 (NR_025220)            | 384/418 (92%) |

|        |          |                                                      |               |
|--------|----------|------------------------------------------------------|---------------|
| P39-8  | AB679796 | <i>Sphaerisporangium melleum</i> 3-28(8) (NR_041302) | 186/203 (92%) |
| P39-10 | AB679797 | <i>Thermomicrobium roseum</i> (NR_044678)            | 321/395 (81%) |
| P53-1  | AB679798 | <i>Orientia tsutsugamushi</i> Karp (NR_025860)       | 173/203 (85%) |
| P53-4  | AB679800 | <i>Rubrobacter radiotolerans</i> P 1 (NR_029191)     | 346/375 (92%) |
| P53-5  | AB679801 | <i>Rubrobacter radiotolerans</i> P 1 (NR_029191)     | 312/346 (90%) |
| P53-6  | AB679802 | <i>Rubrobacter radiotolerans</i> P 1 (NR_029191)     | 353/384 (92%) |
| P53-7  | AB679803 | <i>Rubrobacter taiwanensis</i> LS-293 (NR_025220)    | 279/306 (91%) |

---

***Crome green biofilm***

|       |          |                                                           |               |
|-------|----------|-----------------------------------------------------------|---------------|
| G01-1 | AB679824 | <i>Planktothricoides raciborskii</i> NIES-207 (NR_040858) | 310/335 (93%) |
| G01-9 | AB679825 | <i>Planktothricoides raciborskii</i> NIES-207 (NR_040858) | 332/363 (91%) |
| G27-4 | AB679826 | <i>Rubidibacter lacunae</i> KORDI 51-2 (NR_044104)        | 319/364 (88%) |
| G27-5 | AB679827 | <i>Rubrobacter radiotolerans</i> P 1 (NR_029191)          | 496/526 (94%) |
| G31-1 | AB679828 | <i>Rubidibacter lacunae</i> KORDI 51-2 (NR_044104)        | 319/364 (88%) |
| G31-2 | AB679829 | <i>Rubrobacter radiotolerans</i> P 1 (NR_029191)          | 216/229 (94%) |

---

***Signal violet biofilm***

|       |          |                                                           |               |
|-------|----------|-----------------------------------------------------------|---------------|
| V15-1 | AB679816 | <i>Planktothricoides raciborskii</i> NIES-207 (NR_040858) | 282/323 (87%) |
| V15-2 | AB679817 | <i>Planktothricoides raciborskii</i> NIES-207 (NR_040858) | 287/333 (86%) |
| V15-3 | AB679818 | <i>Planktothricoides raciborskii</i> NIES-207 (NR_040858) | 306/346 (88%) |
| V15-4 | AB679819 | <i>Planktothricoides raciborskii</i> NIES-207 (NR_040858) | 306/349 (88%) |
| V53-1 | AB679821 | <i>Planktothricoides raciborskii</i> NIES-207 (NR_040858) | 294/331 (89%) |
| V53-2 | AB679822 | <i>Planktothricoides raciborskii</i> NIES-207 (NR_040858) | 212/235 (90%) |

|                                  |          |                                                                     |               |
|----------------------------------|----------|---------------------------------------------------------------------|---------------|
| V53-4                            | AB679822 | <i>Planktothricoides raciborskii</i> NIES-207 (NR_040858)           | 277/310 (89%) |
| <b><i>Black grey biofilm</i></b> |          |                                                                     |               |
| B06-1                            | AB679804 | <i>Planktothricoides raciborskii</i> NIES-207 (NR_040858)           | 311/348 (89%) |
| B06-2                            | AB679805 | <i>Herpetosiphon geysericola</i> GC-42 (NR_028694)                  | 290/339 (86%) |
| B23-1                            | AB679806 | <i>Methylobacterium gregans</i> 002-074 (NR_041440)                 | 295/360 (82%) |
| B23-3                            | AB679807 | <i>Pseudacidovorax intermedius</i> CC-21 (NR_044241)                | 255/307 (83%) |
| B36-1                            | AB679808 | <i>Prochlorococcus marinus</i> subsp. pastoris PCC 9511 (NR_028762) | 336/382 (88%) |
| B36-2                            | AB679809 | <i>Prochlorococcus marinus</i> subsp. pastoris PCC 9511 (NR_028762) | 354/402 (88%) |
| B36-3                            | AB679810 | <i>Prochlorococcus marinus</i> subsp. pastoris PCC 9511 (NR_028762) | 327/371 (88%) |
| B36-4                            | AB679811 | <i>Prochlorococcus marinus</i> subsp. pastoris PCC 9511 (NR_028762) | 336/382 (88%) |
| B53-1                            | AB679813 | <i>Rubrobacter radiotolerans</i> P 1 (NR_029191)                    | 416/438 (95%) |
| B53-2                            | AB679814 | <i>Chloroflexus aurantiacus</i> J-10-fl (NR_043411)                 | 159/182 (87%) |
| B53-3                            | AB679815 | <i>Verrucomicrobium spinosum</i> DSM 4136 (NR_026266)               | 178/204 (87%) |
| <b><i>Blue green biofilm</i></b> |          |                                                                     |               |
| BG1-1                            | AB679757 | <i>Truepera radiovictrix</i> RQ-24 (NR_043482)                      | 223/235 (95%) |
| BG1-2                            | AB679758 | <i>Truepera radiovictrix</i> RQ-24 (NR_043482)                      | 356/392 (91%) |
| BG1-3                            | AB679759 | <i>Rubidibacter lacunae</i> KORDI 51-2 (NR_044104)                  | 249/286 (87%) |
| BG1-4                            | AB679760 | <i>Rubidibacter lacunae</i> KORDI 51-2 (NR_044104)                  | 256/288 (89%) |
| BG1-5                            | AB679761 | <i>Salisaeta longa</i> S4-4 (NR_044496)                             | 302/353 (86%) |
| BG1-8                            | AB679762 | <i>Rubrobacter taiwanensis</i> LS-293 (NR_025220)                   | 380/413 (92%) |
| BG1-9                            | AB679763 | <i>Mycoplana dimorpha</i> IAM 13154 (NR_043388)                     | 331/363 (91%) |

|        |          |                                                         |               |
|--------|----------|---------------------------------------------------------|---------------|
| BG1-11 | AB679764 | <i>Sphaerobacter thermophilus</i> DSM 20745 (NR_042118) | 197/217 (91%) |
| BG1-12 | AB679765 | <i>Sphaerobacter thermophilus</i> DSM 20745 (NR_042118) | 354/432 (82%) |
| BG4-1  | AB679766 | <i>Rubidibacter lacunae</i> KORDI 51-2 (NR_044104)      | 305/345 (88%) |
| BG4-2  | AB679767 | <i>Truepera radiovictrix</i> RQ-24 (NR_043482)          | 250/275 (91%) |
| BG4-3  | AB679768 | <i>Rubidibacter lacunae</i> KORDI 51-2 (NR_044104)      | 290/327 (89%) |
| BG4-4  | AB679769 | <i>Rubidibacter lacunae</i> KORDI 51-2 (NR_044104)      | 308/349 (88%) |
| BG4-5  | AB679770 | <i>Rubidibacter lacunae</i> KORDI 51-2 (NR_044104)      | 305/345 (88%) |
| BG4-6  | AB679771 | <i>Salisaeta longa</i> strain S4-4 (NR_044496)          | 298/352 (85%) |
| BG4-7  | AB679772 | <i>Rubrobacter taiwanensis</i> LS-293 (NR_025220)       | 291/316 (92%) |
| BG4-8  | AB679773 | <i>Rubrobacter taiwanensis</i> LS-293 (NR_025220)       | 337/367 (92%) |
| BG4-10 | AB679774 | <i>Streptomyces stramineus</i> NBRC 16131 (NR_041198)   | 224/236 (95%) |
| BG4-11 | AB679775 | <i>Sphaerobacter thermophilus</i> DSM 20745 (NR_042118) | 249/274 (91%) |
| BG4-12 | AB679776 | <i>Sphaerobacter thermophilus</i> DSM 20745 (NR_042118) | 202/222 (91%) |
| BG5-1  | AB679777 | <i>Roseibacillus persicicus</i> YM26-010 (NR_041623)    | 259/310 (84%) |
| BG5-6  | AB679778 | <i>Rubidibacter lacunae</i> KORDI 51-2 (NR_044104)      | 290/327 (89%) |

---
